# Supplementary material for: Electrochemical study of 4-chloroaniline in a water/acetonitrile mixture. A new method for the synthesis of 4-chloro-2-(phenylsulfonyl)aniline and N-(4-chlorophenyl)benzenesulfonamide
Source: Royal Society of Chemistry journal article supplement (doi:10.1039/d0ra05680d), 2020-01-01
Supplement: d0ra05680d1.pdf [file d0ra05680d1.pdf]

## Electrochemical Study of 4-Chloroaniline in Water/Acetonitrile Mixture. A new Method for the Synthesis of 4-Chloro-2-(phenylsulfonyl)aniline and *N*-(4-Chlorophenyl)benzenesulfonamide

Niloofar Mohamadighader,<sup>a</sup> Mahnaz Saraei,<sup>a</sup> Davood Nematollahi,<sup>\*b</sup> Hamed Goljani<sup>b</sup>

<sup>a</sup>Department of Chemistry, Payame Noor University, Tehran, Iran

<sup>b</sup>Faculty of Chemistry, Bu-Ali-Sina University, Hamedan 65174, Iran.

nemat@basu.ac.ir.

| No |                                                                     | Page |
|----|---------------------------------------------------------------------|------|
| 1  | FT-IR spectrum of <b>1b</b> .....                                   | 2    |
| 2  | <sup>1</sup> H NMR spectrum of <b>1b</b> .....                      | 3    |
| 3  | <sup>1</sup> H NMR spectrum of <b>1b</b> (Expanded).....            | 4    |
| 4  | <sup>13</sup> C NMR spectrum of <b>1b</b> .....                     | 5    |
| 5  | <sup>13</sup> C NMR spectrum of <b>1b</b> (Expanded).....           | 6    |
| 6  | MS spectrum of <b>1b</b> .....                                      | 7    |
| 7  | FT-IR spectrum of <b>2b</b> .....                                   | 8    |
| 8  | <sup>1</sup> H NMR spectrum of <b>2b</b> .....                      | 9    |
| 9  | <sup>1</sup> H NMR spectrum of <b>2b</b> (Expanded).....            | 10   |
| 10 | <sup>13</sup> C NMR spectrum of <b>2b</b> .....                     | 11   |
| 11 | <sup>13</sup> C NMR spectrum of <b>2b</b> (Expanded).....           | 12   |
| 12 | Ms spectrum of <b>2b</b> .....                                      | 13   |
| 13 | Cyclic voltammograms of <b>PCA</b> at different concentrations..... | 14   |

FT-IR spectrum of 1b

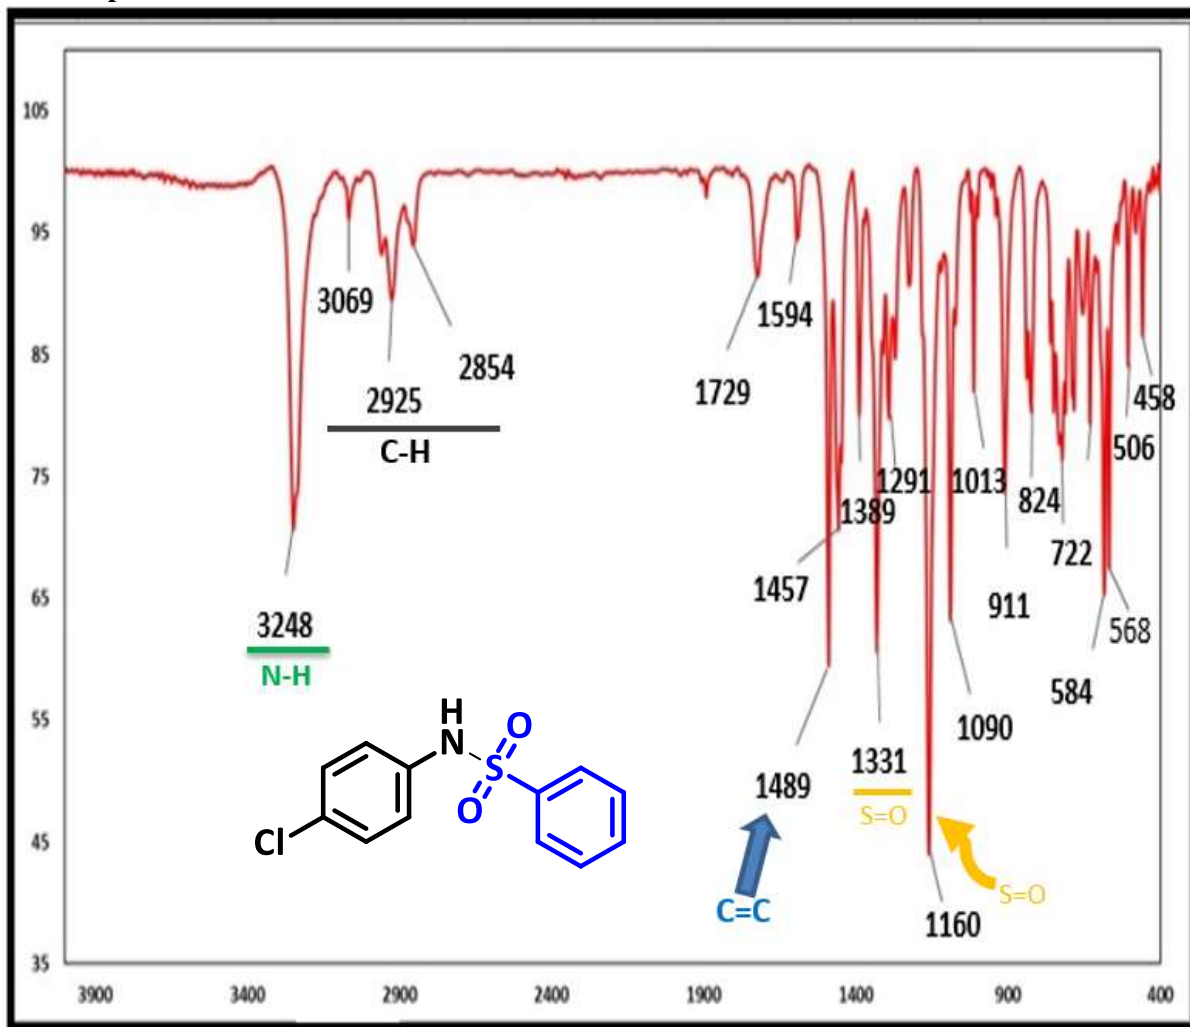

<sup>1</sup>H NMR spectrum of 1b

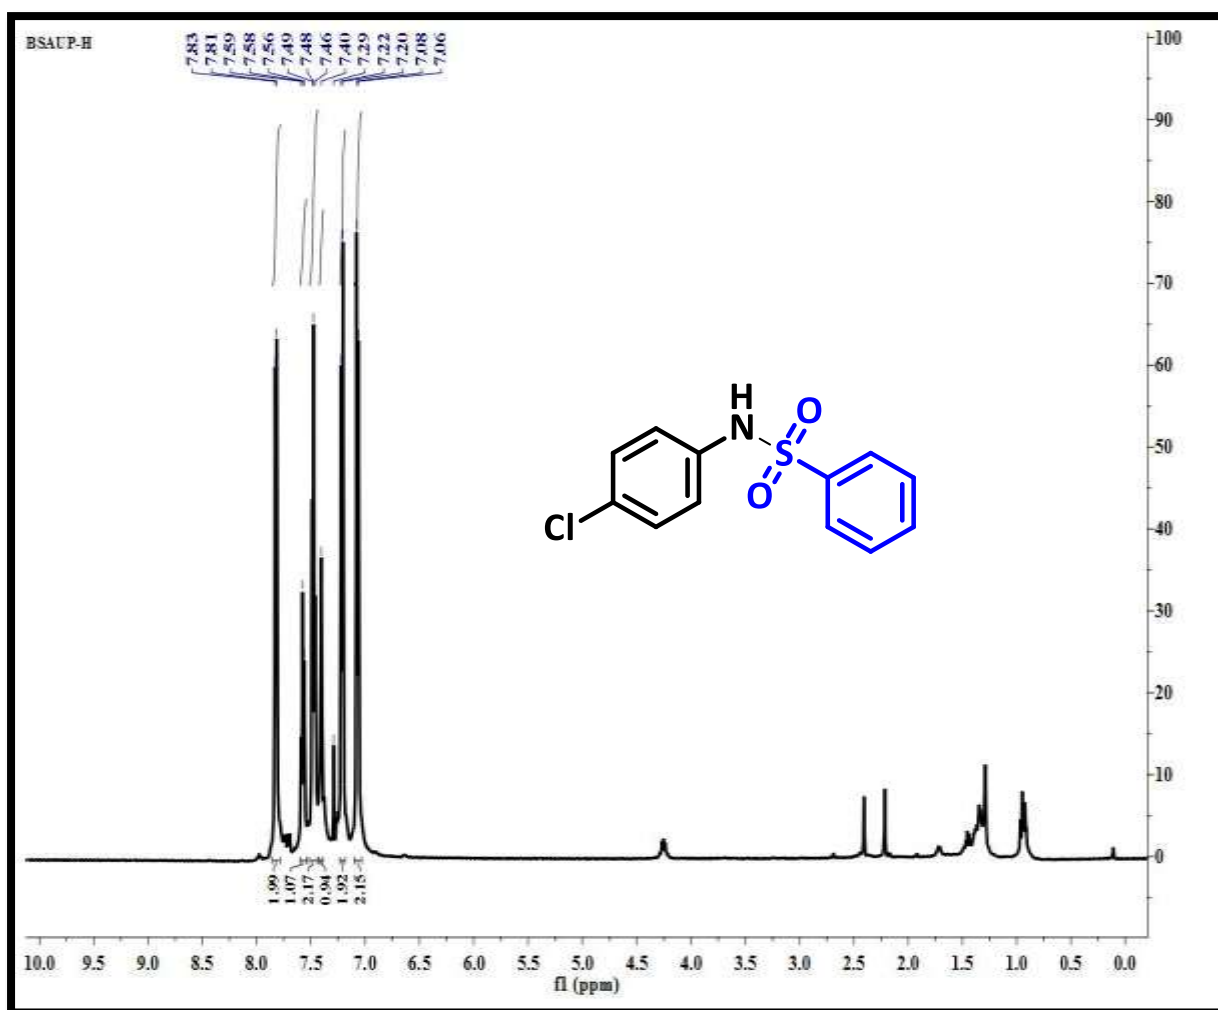

# Expanded $^1\text{H}$ NMR spectrum of 1b

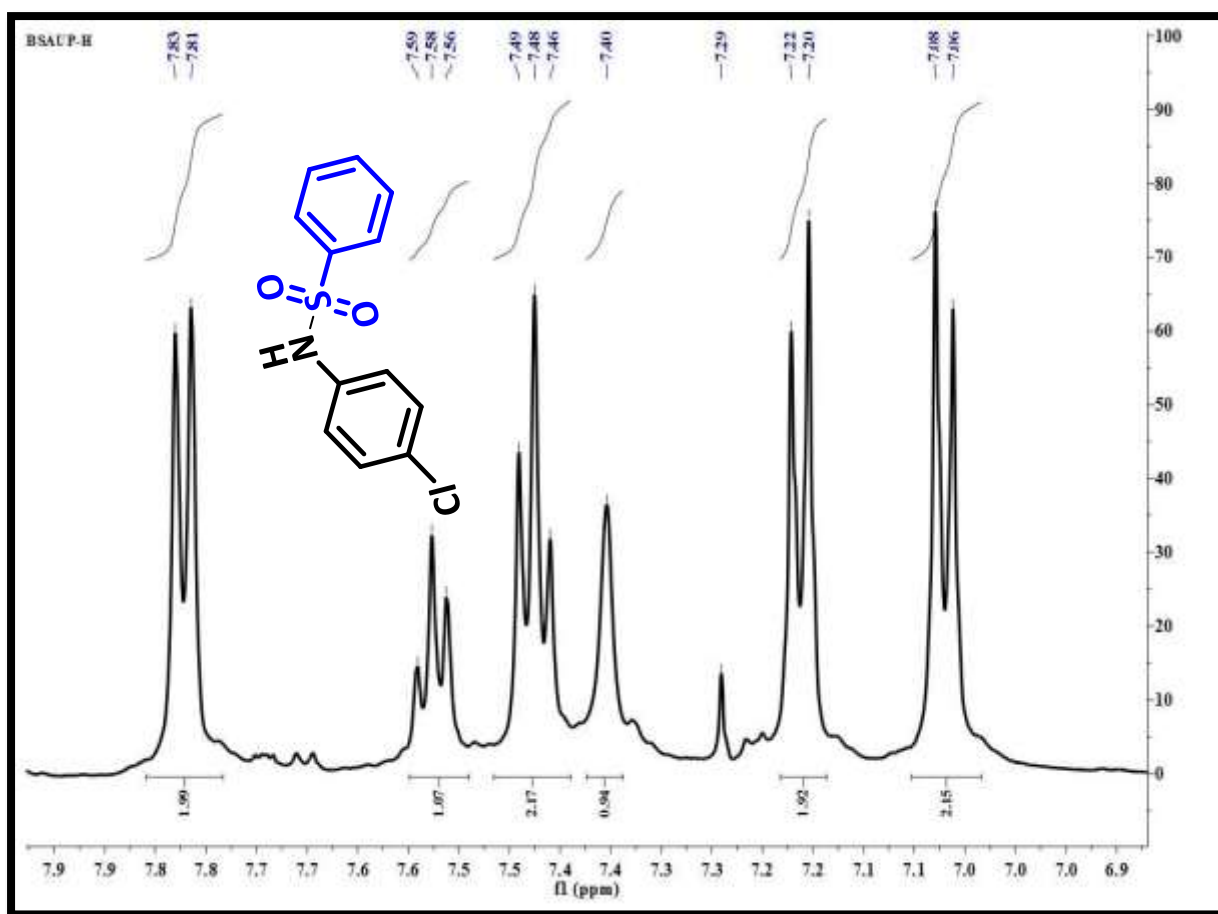

<sup>13</sup>C NMR spectrum of 1b

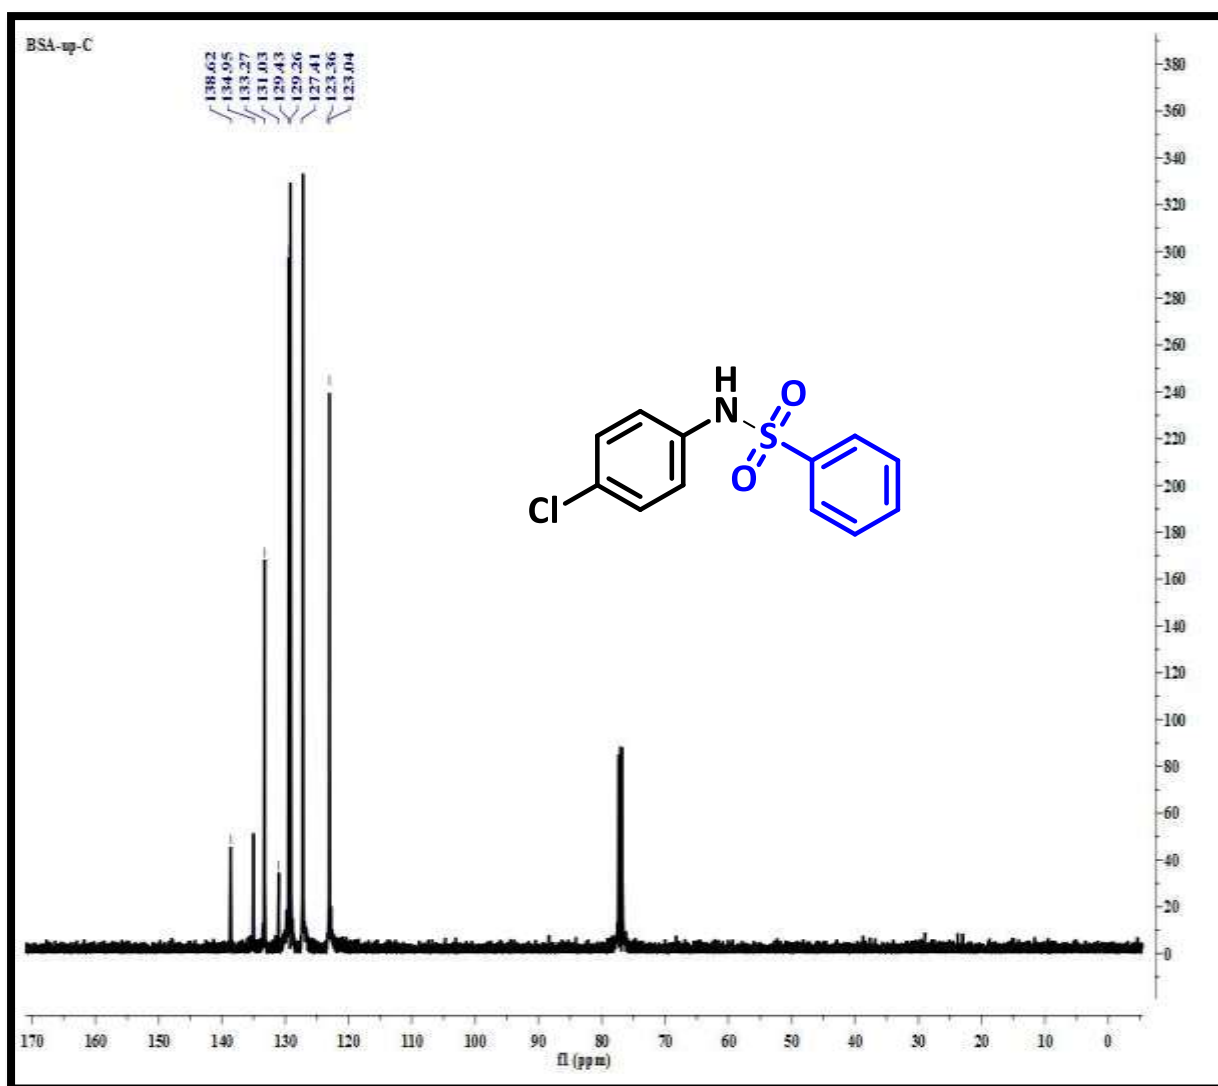

### Expanded $^{13}\text{C}$ NMR spectrum of 1b

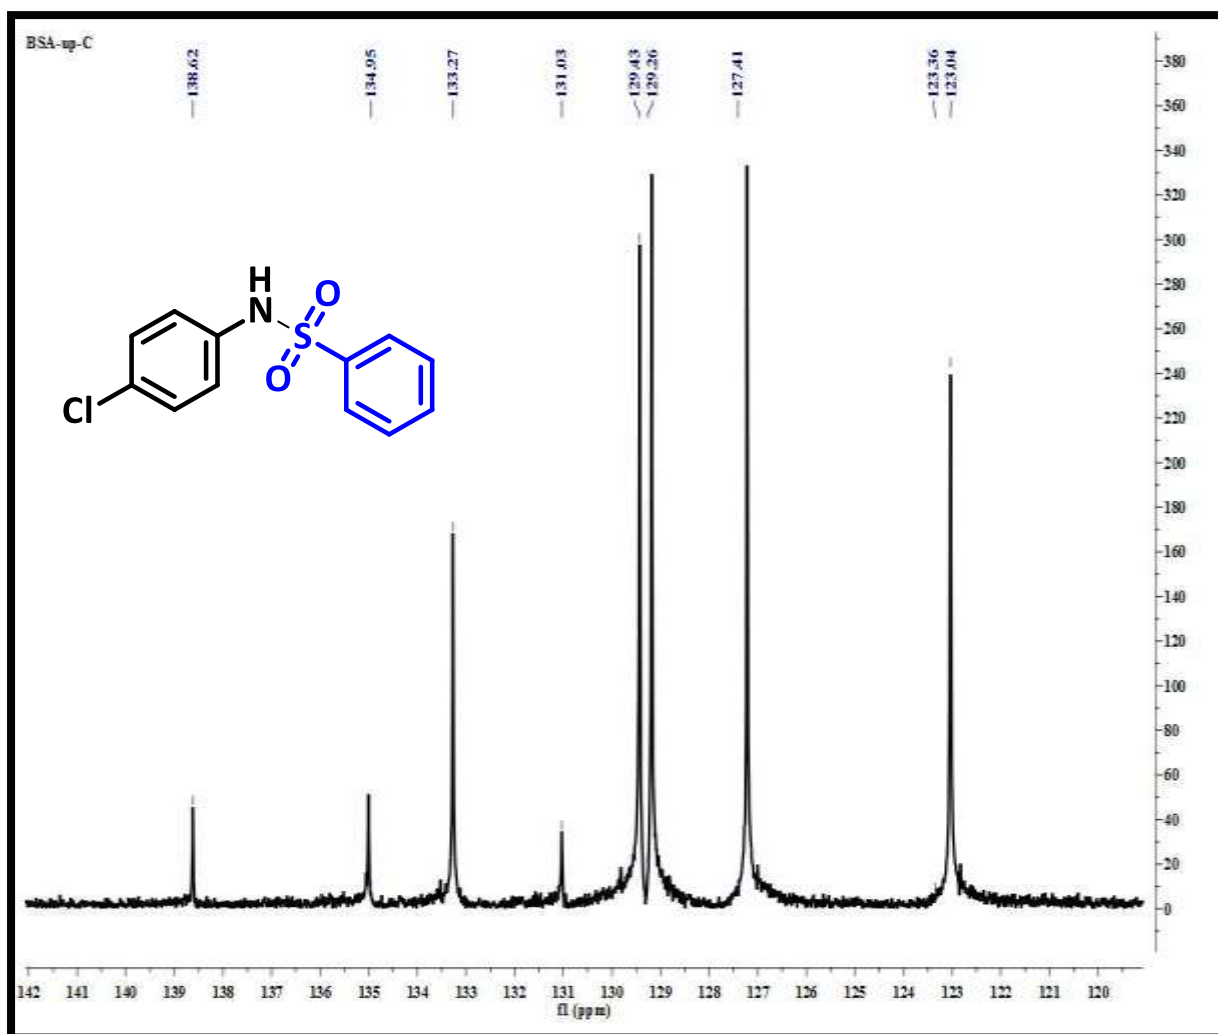

# MS spectrum of 1b

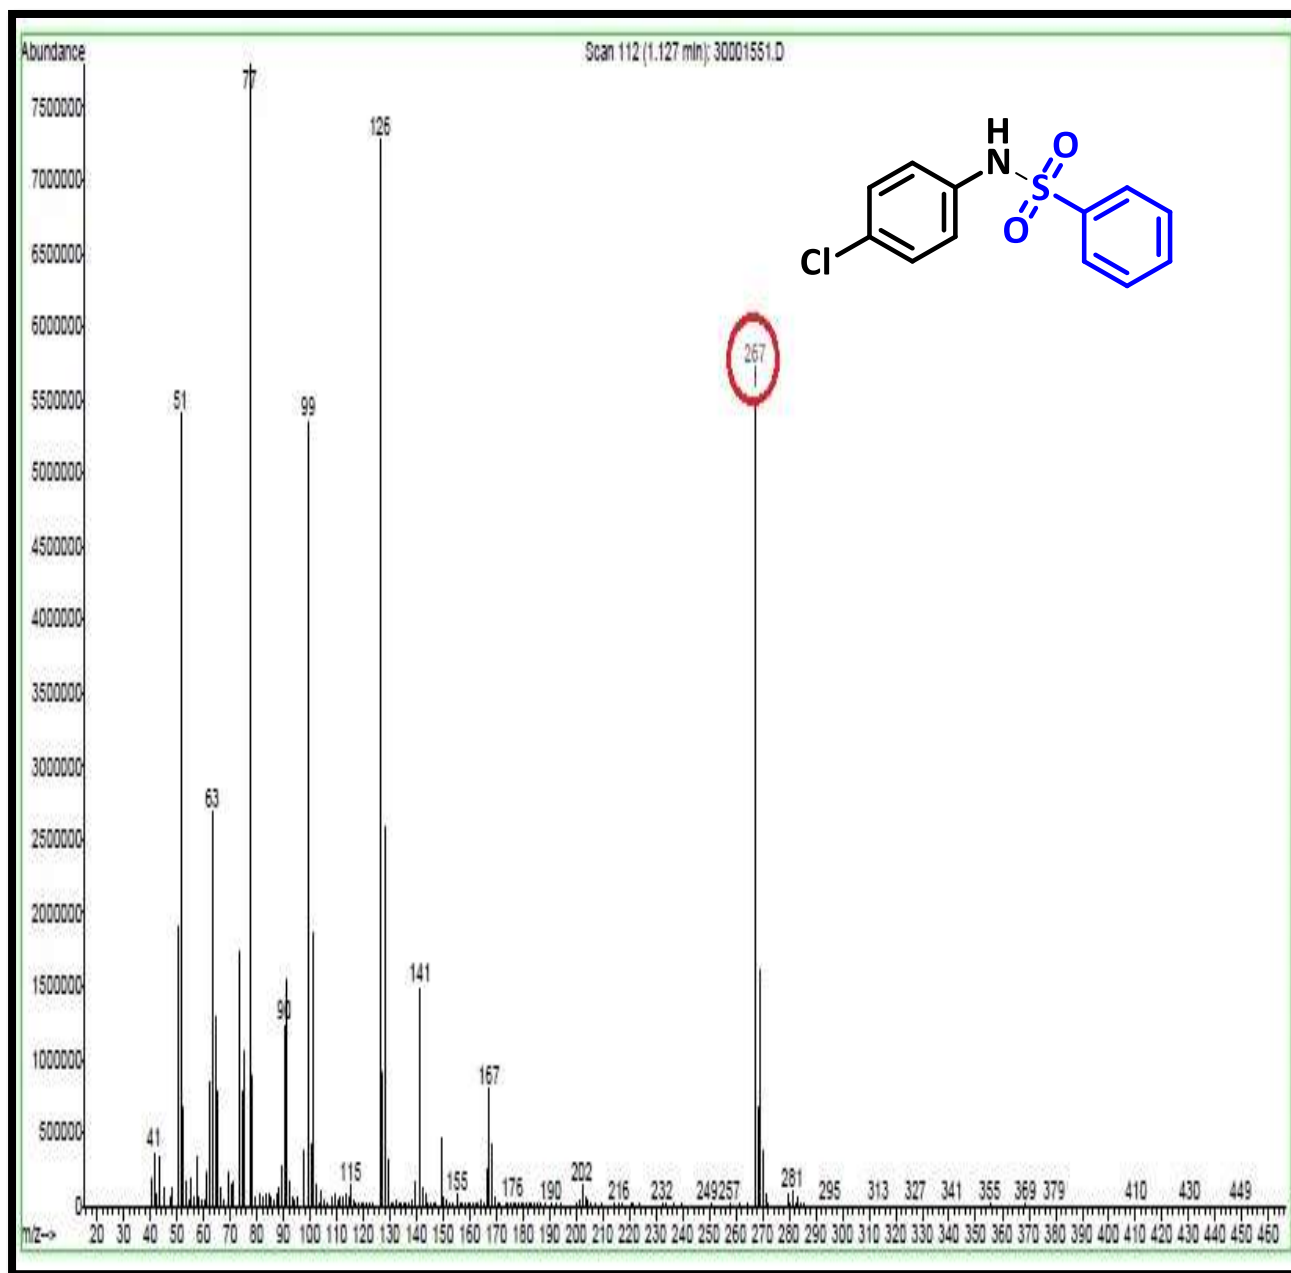

FT-IR spectrum of 2b

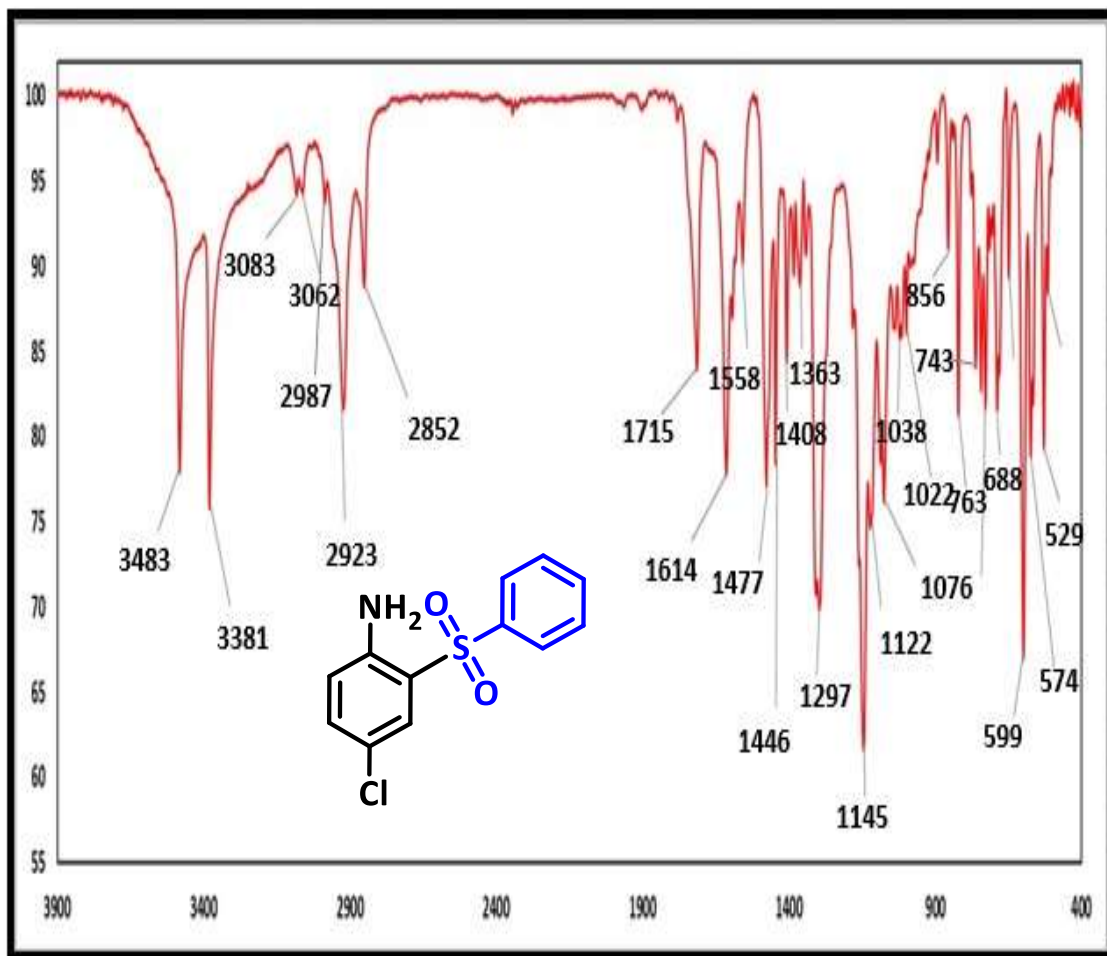



# <sup>1</sup>H NMR spectrum of 2b

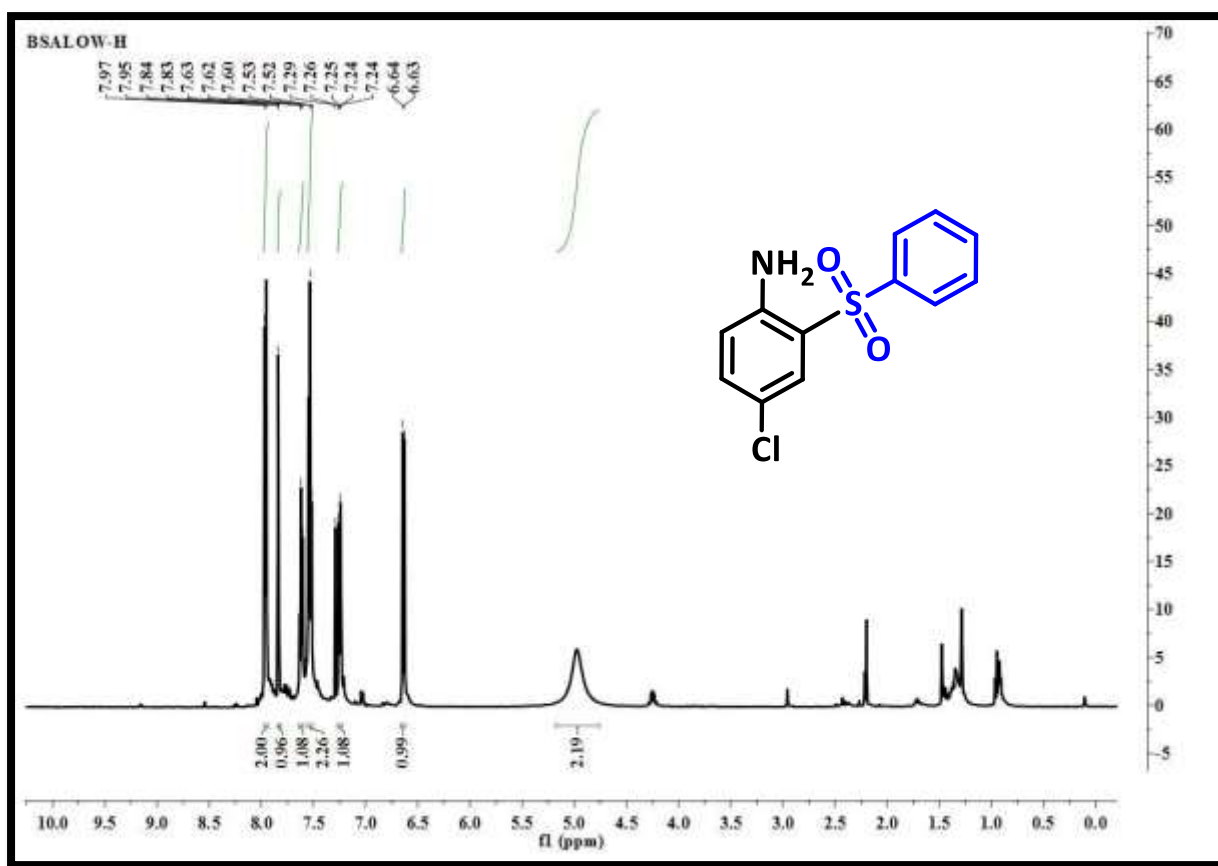

### Expanded $^1\text{H}$ NMR spectrum of 2b

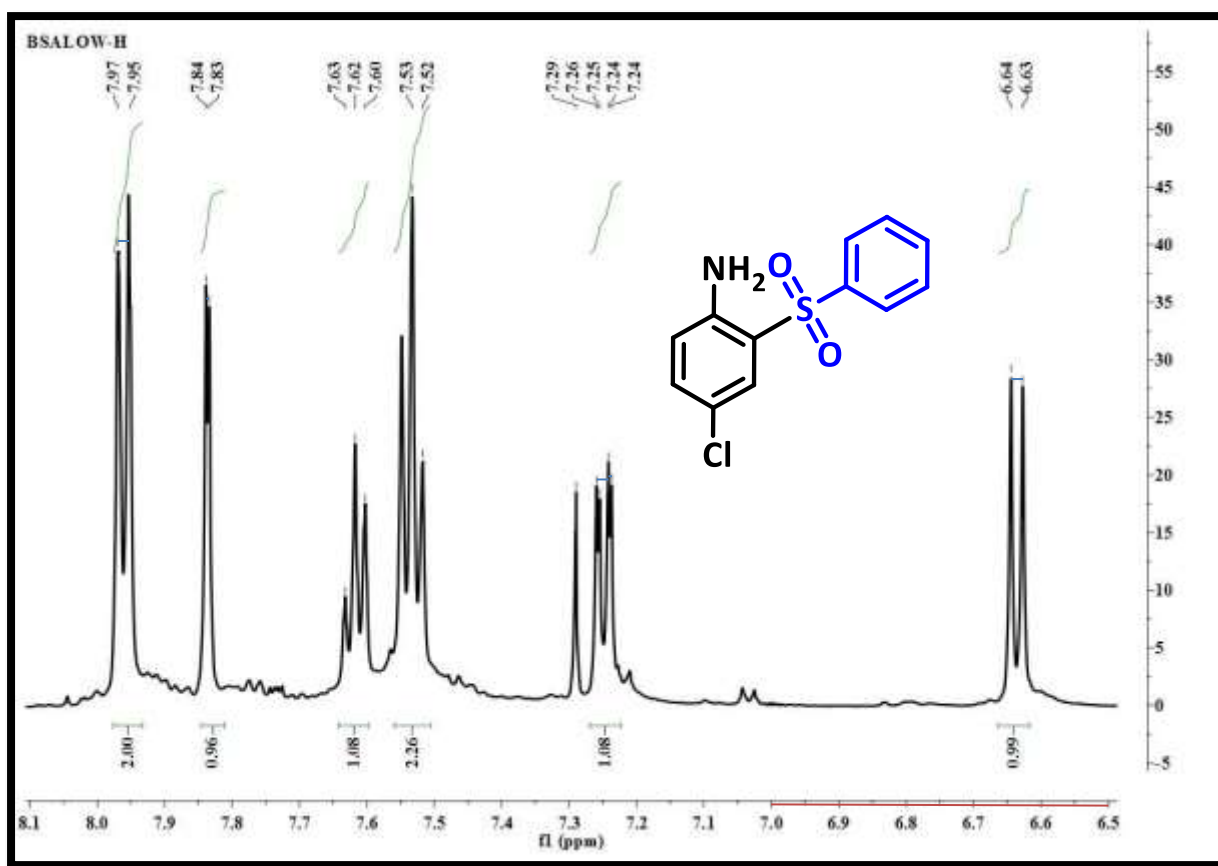

<sup>13</sup>C NMR spectrum of 2b

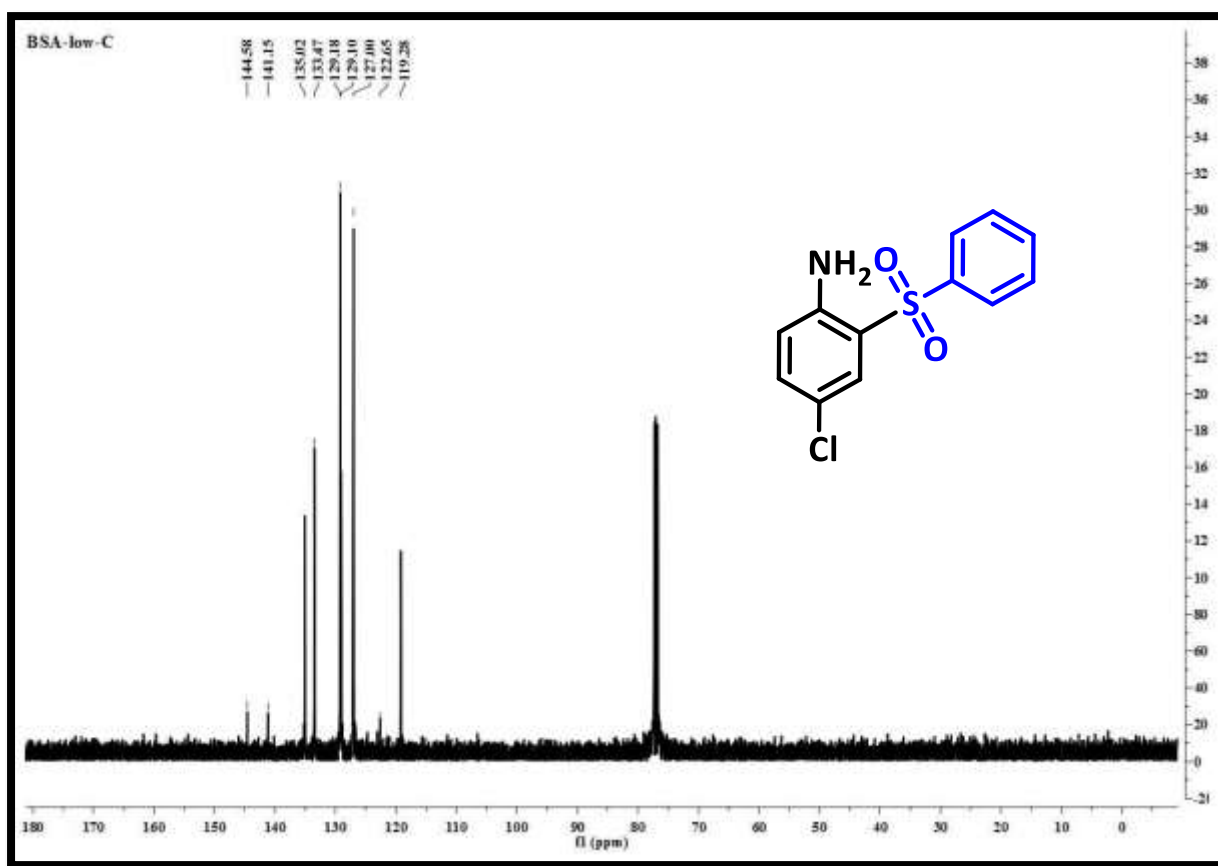

## Expanded $^{13}\text{C}$ NMR of 2b

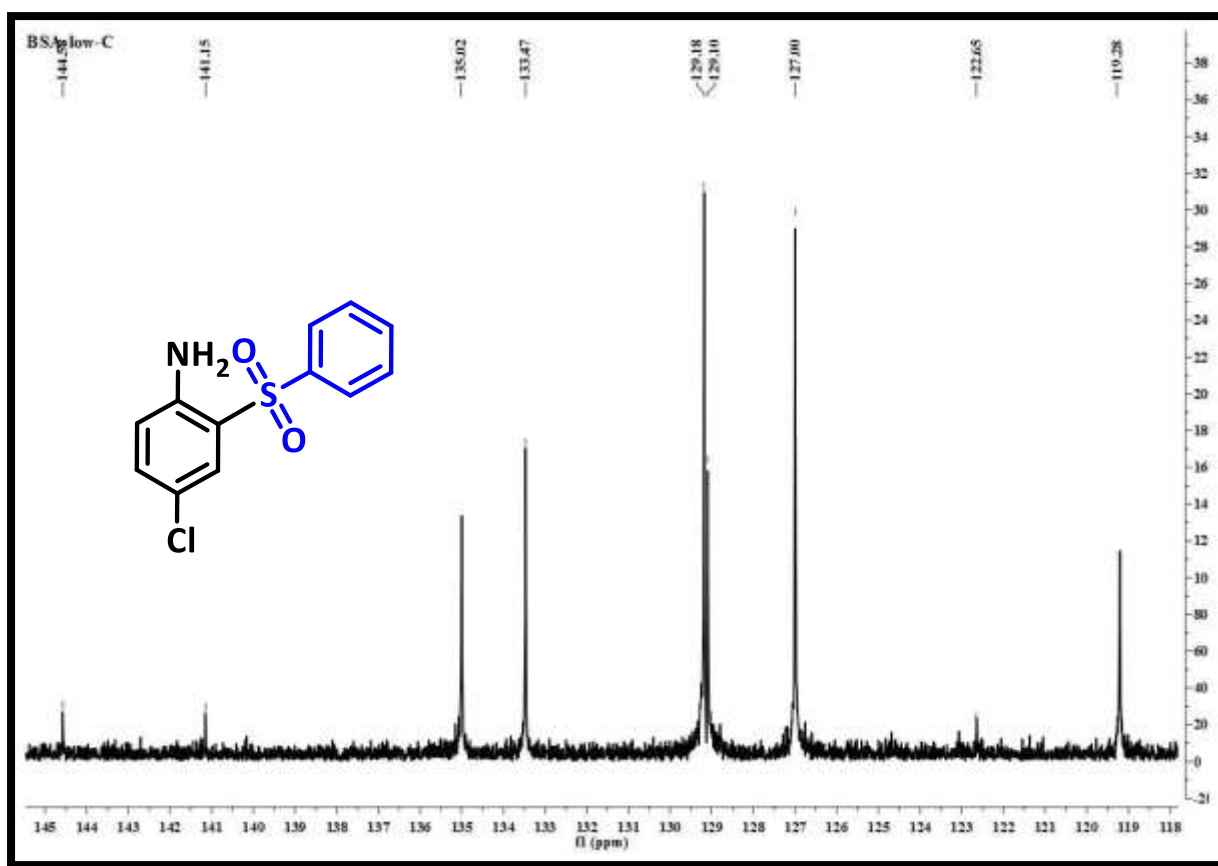

# Ms spectrum of 2b

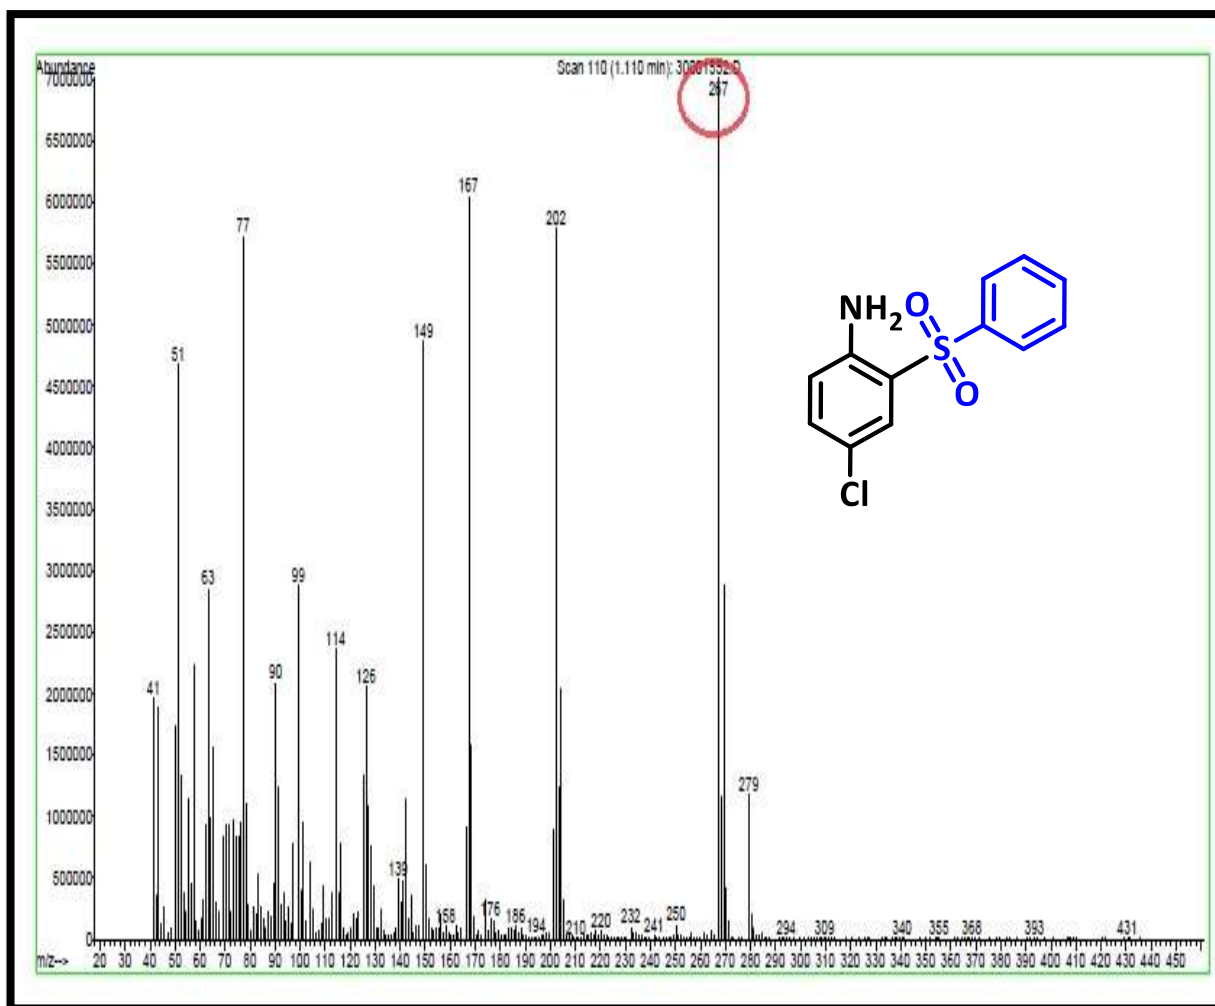

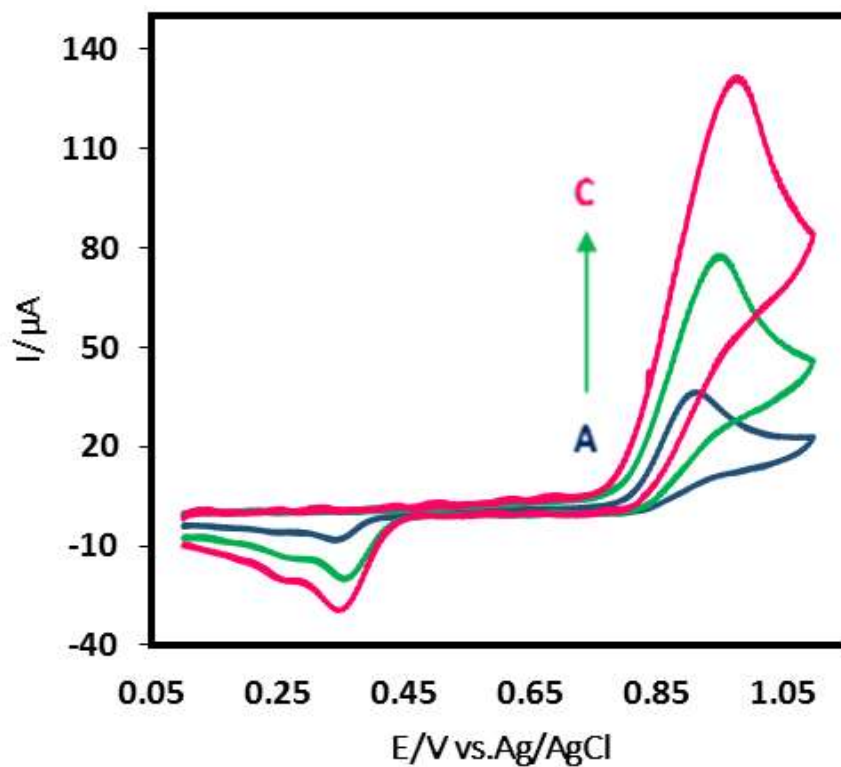

**Figure S1:** Cyclic voltammograms of **PCA** at different concentrations (A: 1, B: 3 and C: 6 mM) at 100 mV/s. Solvent: Water (0.1 M perchloric acid)/acetonitrile (50/50, v/v) mixture. Working electrode: Glassy carbon electrode. Temperature: room temperature.
